# Supplementary material
Source: publisher site journal article supplement (https://www.spandidos-publications.com/6845/downloadSupplementary)
Supplement: Supplementary file 1 [file downloadSupplementary]

## Sheet: STableII Up-regulated
Table SII. Upregulated genes in PSAT1-silenced PC9 cells are listed with their log2 (fold-change), P- and q-values (adjusted p).
Gene ID	Symbol	log2(shPSAT1/Control)	P-value	q-value
ENSG00000150667	FSIP1	4.34115	5e-05	0.00214872
ENSG00000185479	KRT6B	2.68984	5e-05	0.00214872
ENSG00000064886	CHI3L2	2.45906	5e-05	0.00214872
ENSG00000179344	HLA-DQB1	2.169	5e-05	0.00214872
ENSG00000223534	HLA-DQB1-AS1	2.00816	0.0002	0.00669062
ENSG00000181577	C6orf223	1.78974	5e-05	0.00214872
ENSG00000041982	TNC	1.78586	0.00015	0.0053038
ENSG00000155792	DEPTOR	1.70514	5e-05	0.00214872
ENSG00000115009	CCL20	1.62457	5e-05	0.00214872
ENSG00000164825	DEFB1	1.58488	5e-05	0.00214872
ENSG00000163082	SGPP2	1.57008	5e-05	0.00214872
ENSG00000243649	CFB	1.48045	5e-05	0.00214872
ENSG00000134827	TCN1	1.45446	0.00085	0.0211365
ENSG00000166352	C11orf74	1.44764	5e-05	0.00214872
ENSG00000151065	DCP1B	1.42004	5e-05	0.00214872
ENSG00000155269	GPR78	1.38634	5e-05	0.00214872
ENSG00000119632	IFI27L2	1.33643	5e-05	0.00214872
ENSG00000253552	HOXA-AS2	1.31773	0.00155	0.0338255
ENSG00000053254	FOXN3	1.31341	0.00015	0.0053038
ENSG00000171992	SYNPO	1.28552	5e-05	0.00214872
ENSG00000002726	AOC1	1.26796	5e-05	0.00214872
ENSG00000125730	C3	1.26567	0.0001	0.00380045
ENSG00000105855	ITGB8	1.25926	5e-05	0.00214872
ENSG00000134258	VTCN1	1.24576	5e-05	0.00214872
ENSG00000131620	ANO1	1.24321	5e-05	0.00214872
ENSG00000165474	GJB2	1.23644	5e-05	0.00214872
ENSG00000053108	FSTL4	1.23533	5e-05	0.00214872
ENSG00000228630	HOTAIR	1.21552	0.00025	0.00815175
ENSG00000196935	SRGAP1	1.21078	0.0005	0.0138972
ENSG00000137648	TMPRSS4	1.21019	5e-05	0.00214872
ENSG00000146070	PLA2G7	1.20462	5e-05	0.00214872
ENSG00000165029	ABCA1	1.19995	5e-05	0.00214872
ENSG00000167703	SLC43A2	1.18241	5e-05	0.00214872
ENSG00000215158	RP11-1023L17.1	1.16681	0.00095	0.0232778
ENSG00000275832	ARHGAP23	1.1479	0.0024	0.0469907
ENSG00000106003	LFNG	1.14265	5e-05	0.00214872
ENSG00000131171	SH3BGRL	1.13676	5e-05	0.00214872
ENSG00000254902	ANO1-AS1	1.13366	0.00215	0.0428466
ENSG00000048052	HDAC9	1.12569	5e-05	0.00214872
ENSG00000062282	DGAT2	1.12143	0.0001	0.00380045
ENSG00000104081	BMF	1.11045	5e-05	0.00214872
ENSG00000122547	EEPD1	1.10574	0.00035	0.010475
ENSG00000156804	FBXO32	1.09575	5e-05	0.00214872
ENSG00000233834	AC005083.1	1.093	5e-05	0.00214872
ENSG00000114115	RBP1	1.09285	5e-05	0.00214872
ENSG00000127507	ADGRE2	1.09059	5e-05	0.00214872
ENSG00000082074	FYB	1.07146	5e-05	0.00214872
ENSG00000272666	CTA-384D8.35	1.0654	0.0001	0.00380045
ENSG00000123388	HOXC11	1.06092	5e-05	0.00214872
ENSG00000088836	SLC4A11	1.05374	0.00135	0.0305344
ENSG00000007944	MYLIP	1.04367	5e-05	0.00214872
ENSG00000197506	SLC28A3	1.03973	0.00045	0.0128703
ENSG00000152377	SPOCK1	1.0381	0.00075	0.0191616
ENSG00000174080	CTSF	1.03555	5e-05	0.00214872
ENSG00000197766	CFD	1.03232	5e-05	0.00214872
ENSG00000254632	RP11-21L23.4	1.01205	5e-05	0.00214872
ENSG00000135912	TTLL4	1.01067	5e-05	0.00214872
ENSG00000123094	RASSF8	0.990286	0.00035	0.010475
ENSG00000012779	ALOX5	0.976961	5e-05	0.00214872
ENSG00000162949	CAPN13	0.973796	0.00015	0.0053038
ENSG00000106541	AGR2	0.96157	5e-05	0.00214872
ENSG00000168386	FILIP1L	0.955682	5e-05	0.00214872
ENSG00000101384	JAG1	0.946794	0.0022	0.043791
ENSG00000245532	NEAT1	0.943037	5e-05	0.00214872
ENSG00000147650	LRP12	0.915482	0.0001	0.00380045
ENSG00000106415	GLCCI1	0.89979	0.0015	0.0330789
ENSG00000012124	CD22	0.891597	0.00015	0.0053038
ENSG00000158373	HIST1H2BD	0.885034	5e-05	0.00214872
ENSG00000088881	EBF4	0.884883	0.002	0.040729
ENSG00000100100	PIK3IP1	0.880452	0.00125	0.028738
ENSG00000141655	TNFRSF11A	0.877263	5e-05	0.00214872
ENSG00000143512	HHIPL2	0.876501	0.0006	0.0158362
ENSG00000162645	GBP2	0.875245	5e-05	0.00214872
ENSG00000144115	THNSL2	0.858314	0.00035	0.010475
ENSG00000159167	STC1	0.857443	5e-05	0.00214872
ENSG00000136928	GABBR2	0.854418	5e-05	0.00214872
ENSG00000154153	FAM134B	0.840888	5e-05	0.00214872
ENSG00000106546	AHR	0.839787	0.002	0.040729
ENSG00000180573	HIST1H2AC	0.836084	5e-05	0.00214872
ENSG00000126216	TUBGCP3	0.815282	5e-05	0.00214872
ENSG00000164463	CREBRF	0.815014	0.00025	0.00815175
ENSG00000082068	WDR70	0.813295	5e-05	0.00214872
ENSG00000124145	SDC4	0.812113	5e-05	0.00214872
ENSG00000136943	CTSV	0.811276	5e-05	0.00214872
ENSG00000135821	GLUL	0.803066	5e-05	0.00214872
ENSG00000063601	MTMR1	0.800601	0.0023	0.0452441
ENSG00000197461	PDGFA	0.793158	5e-05	0.00214872
ENSG00000247516	MIR4458HG	0.78122	5e-05	0.00214872
ENSG00000132746	ALDH3B2	0.779066	0.00055	0.0149643
ENSG00000132326	PER2	0.777483	5e-05	0.00214872
ENSG00000186106	ANKRD46	0.774173	0.00075	0.0191616
ENSG00000124466	LYPD3	0.77345	5e-05	0.00214872
ENSG00000174125	TLR1	0.771982	0.0026	0.049631
ENSG00000165507	C10orf10	0.765495	5e-05	0.00214872
ENSG00000167191	GPRC5B	0.760704	0.0001	0.00380045
ENSG00000115828	QPCT	0.759988	0.00185	0.0386608
ENSG00000182578	CSF1R	0.758028	0.0003	0.00945113
ENSG00000185215	TNFAIP2	0.752789	5e-05	0.00214872
ENSG00000169908	TM4SF1	0.748263	5e-05	0.00214872
ENSG00000185483	ROR1	0.746408	0.0001	0.00380045
ENSG00000280693	SH3PXD2A-AS1	0.730424	0.00125	0.028738
ENSG00000139132	FGD4	0.726586	0.0007	0.0179939
ENSG00000111885	MAN1A1	0.723386	5e-05	0.00214872
ENSG00000162714	ZNF496	0.721375	5e-05	0.00214872
ENSG00000085117	CD82	0.718204	5e-05	0.00214872
ENSG00000013588	GPRC5A	0.715403	0.00105	0.0253209
ENSG00000110195	FOLR1	0.705896	5e-05	0.00214872
ENSG00000115457	IGFBP2	0.704712	5e-05	0.00214872
ENSG00000185475	TMEM179B	0.69883	0.0023	0.0452441
ENSG00000125999	BPIFB1	0.697509	5e-05	0.00214872
ENSG00000173653	RCE1	0.69423	0.0007	0.0179939
ENSG00000163347	CLDN1	0.689525	5e-05	0.00214872
ENSG00000131797	CLUHP3	0.687296	0.00035	0.010475
ENSG00000178996	SNX18	0.684463	5e-05	0.00214872
ENSG00000134146	DPH6	0.682643	0.00115	0.0270323
ENSG00000204021	LIPK	0.681233	5e-05	0.00214872
ENSG00000241127	YAE1D1	0.673535	0.00015	0.0053038
ENSG00000150687	PRSS23	0.672314	0.0014	0.031411
ENSG00000176153	GPX2	0.668944	0.0005	0.0138972
ENSG00000106537	TSPAN13	0.668374	5e-05	0.00214872
ENSG00000136205	TNS3	0.667331	0.00025	0.00815175
ENSG00000071189	SNX13	0.665928	5e-05	0.00214872
ENSG00000054277	OPN3	0.66525	0.00155	0.0338255
ENSG00000158467	AHCYL2	0.663772	0.00195	0.0401006
ENSG00000203697	CAPN8	0.651785	5e-05	0.00214872
ENSG00000162244	RPL29	0.650372	5e-05	0.00214872
ENSG00000136155	SCEL	0.64561	5e-05	0.00214872
ENSG00000196683	TOMM7	0.644649	0.0003	0.00945113
ENSG00000125266	EFNB2	0.643647	5e-05	0.00214872
ENSG00000151491	EPS8	0.639663	0.00115	0.0270323
ENSG00000136213	CHST12	0.639189	0.00215	0.0428466
ENSG00000111261	MANSC1	0.638503	5e-05	0.00214872
ENSG00000132329	RAMP1	0.638205	0.00055	0.0149643
ENSG00000183617	MRPL54	0.638115	5e-05	0.00214872
ENSG00000013441	CLK1	0.63554	0.00025	0.00815175
ENSG00000148730	EIF4EBP2	0.630393	5e-05	0.00214872
ENSG00000120549	KIAA1217	0.629946	0.00085	0.0211365
ENSG00000124102	PI3	0.629522	5e-05	0.00214872
ENSG00000152223	EPG5	0.627879	0.00185	0.0386608
ENSG00000164151	ICE1	0.627311	5e-05	0.00214872
ENSG00000166949	SMAD3	0.626648	0.0014	0.031411
ENSG00000145476	CYP4V2	0.622676	0.0001	0.00380045
ENSG00000105968	H2AFV	0.61998	0.0001	0.00380045
ENSG00000173120	KDM2A	0.615651	0.0011	0.0262248
ENSG00000162078	ZG16B	0.608931	5e-05	0.00214872
ENSG00000106355	LSM5	0.606528	5e-05	0.00214872
ENSG00000150347	ARID5B	0.605515	5e-05	0.00214872
ENSG00000189060	H1F0	0.605456	5e-05	0.00214872
ENSG00000147689	FAM83A	0.599944	0.0008	0.0201019
ENSG00000134755	DSC2	0.599584	5e-05	0.00214872
ENSG00000095015	MAP3K1	0.597626	5e-05	0.00214872
ENSG00000132669	RIN2	0.588184	0.00025	0.00815175
ENSG00000227471	AKR1B15	0.58669	0.0007	0.0179939
ENSG00000156453	PCDH1	0.586528	5e-05	0.00214872
ENSG00000255717	SNHG1	0.582534	5e-05	0.00214872
ENSG00000065883	CDK13	0.580519	5e-05	0.00214872
ENSG00000075461	CACNG4	0.576393	5e-05	0.00214872
ENSG00000221978	CCNL2	0.575764	0.0011	0.0262248
ENSG00000136261	BZW2	0.575132	5e-05	0.00214872
ENSG00000133316	WDR74	0.573027	0.0009	0.0222478
ENSG00000257093	KIAA1147	0.57124	5e-05	0.00214872
ENSG00000121481	RNF2	0.570876	0.00215	0.0428466
ENSG00000163220	S100A9	0.570841	5e-05	0.00214872
ENSG00000265972	TXNIP	0.568045	0.0011	0.0262248
ENSG00000167755	KLK6	0.567502	5e-05	0.00214872
ENSG00000231806	PCAT7	0.56636	0.00115	0.0270323
ENSG00000173334	TRIB1	0.565054	5e-05	0.00214872
ENSG00000005812	FBXL3	0.56492	0.0007	0.0179939
ENSG00000228649	AC005682.5	0.563339	0.00155	0.0338255
ENSG00000015676	NUDCD3	0.562001	0.0017	0.0362494
ENSG00000106780	MEGF9	0.561223	5e-05	0.00214872
ENSG00000185467	KPNA7	0.559331	0.00045	0.0128703
ENSG00000146576	C7orf26	0.557046	0.0026	0.049631
ENSG00000167074	TEF	0.553853	0.00215	0.0428466
ENSG00000054793	ATP9A	0.552787	5e-05	0.00214872
ENSG00000152284	TCF7L1	0.551942	0.0002	0.00669062
ENSG00000142192	APP	0.551699	0.0003	0.00945113
ENSG00000148346	LCN2	0.550955	0.00025	0.00815175
ENSG00000136271	DDX56	0.545866	0.00155	0.0338255
ENSG00000133195	SLC39A11	0.54437	0.00155	0.0338255
ENSG00000124225	PMEPA1	0.543995	5e-05	0.00214872
ENSG00000111269	CREBL2	0.542848	5e-05	0.00214872
ENSG00000113070	HBEGF	0.538834	0.0002	0.00669062
ENSG00000122644	ARL4A	0.537008	0.00215	0.0428466
ENSG00000086062	B4GALT1	0.536903	5e-05	0.00214872
ENSG00000163739	CXCL1	0.534887	0.00055	0.0149643
ENSG00000136238	RAC1	0.533999	0.0002	0.00669062
ENSG00000119139	TJP2	0.533211	0.00035	0.010475
ENSG00000124587	PEX6	0.521015	0.00015	0.0053038
ENSG00000134313	KIDINS220	0.519747	0.0006	0.0158362
ENSG00000012822	CALCOCO1	0.517774	0.00085	0.0211365
ENSG00000162236	STX5	0.515156	5e-05	0.00214872
ENSG00000109321	AREG	0.513968	0.0012	0.0278946
ENSG00000203778	FAM229B	0.513335	0.00175	0.0369395
ENSG00000115306	SPTBN1	0.511828	5e-05	0.00214872
ENSG00000198246	SLC29A3	0.507184	0.00055	0.0149643
ENSG00000107862	GBF1	0.505306	5e-05	0.00214872
ENSG00000058668	ATP2B4	0.503546	0.0004	0.0116187
ENSG00000159388	BTG2	0.502062	0.001	0.0243605
ENSG00000150457	LATS2	0.500992	0.00035	0.010475
ENSG00000189043	NDUFA4	0.499306	0.0012	0.0278946
ENSG00000010270	STARD3NL	0.498402	0.00035	0.010475
ENSG00000123472	ATPAF1	0.498177	0.0018	0.0378045
ENSG00000281406	BLACAT1	0.49812	0.0008	0.0201019
ENSG00000146648	EGFR	0.497696	5e-05	0.00214872
ENSG00000171004	HS6ST2	0.494494	5e-05	0.00214872
ENSG00000100485	SOS2	0.494286	0.0002	0.00669062
ENSG00000162341	TPCN2	0.493538	0.0007	0.0179939
ENSG00000198142	SOWAHC	0.49345	0.0004	0.0116187
ENSG00000146676	PURB	0.488015	0.0001	0.00380045
ENSG00000167996	FTH1	0.484544	0.0001	0.00380045
